# Supplementary material for: Dry storage of multiple reagent types within a paper microfluidic device for phenylalanine monitoring
Source: Royal Society of Chemistry journal article supplement (doi:10.1039/d0ay02043e), 2021-01-01
Supplement: d0ay02043e1.pdf [file d0ay02043e1.pdf]

## Supporting Information

### **Dry storage of multiple reagent types within a paper microfluidic device for phenylalanine monitoring**

Lael Wentland, Rachel Polaski, and Elain Fu\*

School of Chemical, Biological, and Environmental Engineering, Oregon State University, Corvallis, OR 97331

### Storage of colorimetric reagents mPMS and NBT

Differences between the mean signals of stored reagents and freshly-dried reagents are displayed. The difference in means was calculated as follows,  $difference\ in\ means = (freshly\text{-}dried\ samples\ mean) - (stored\ samples\ mean)$ , and then plotted for various storage times. The error bars display the 99% confidence intervals using the t-distribution. Degrees of freedom were estimated using the Welch-Satterthwaite approximation.

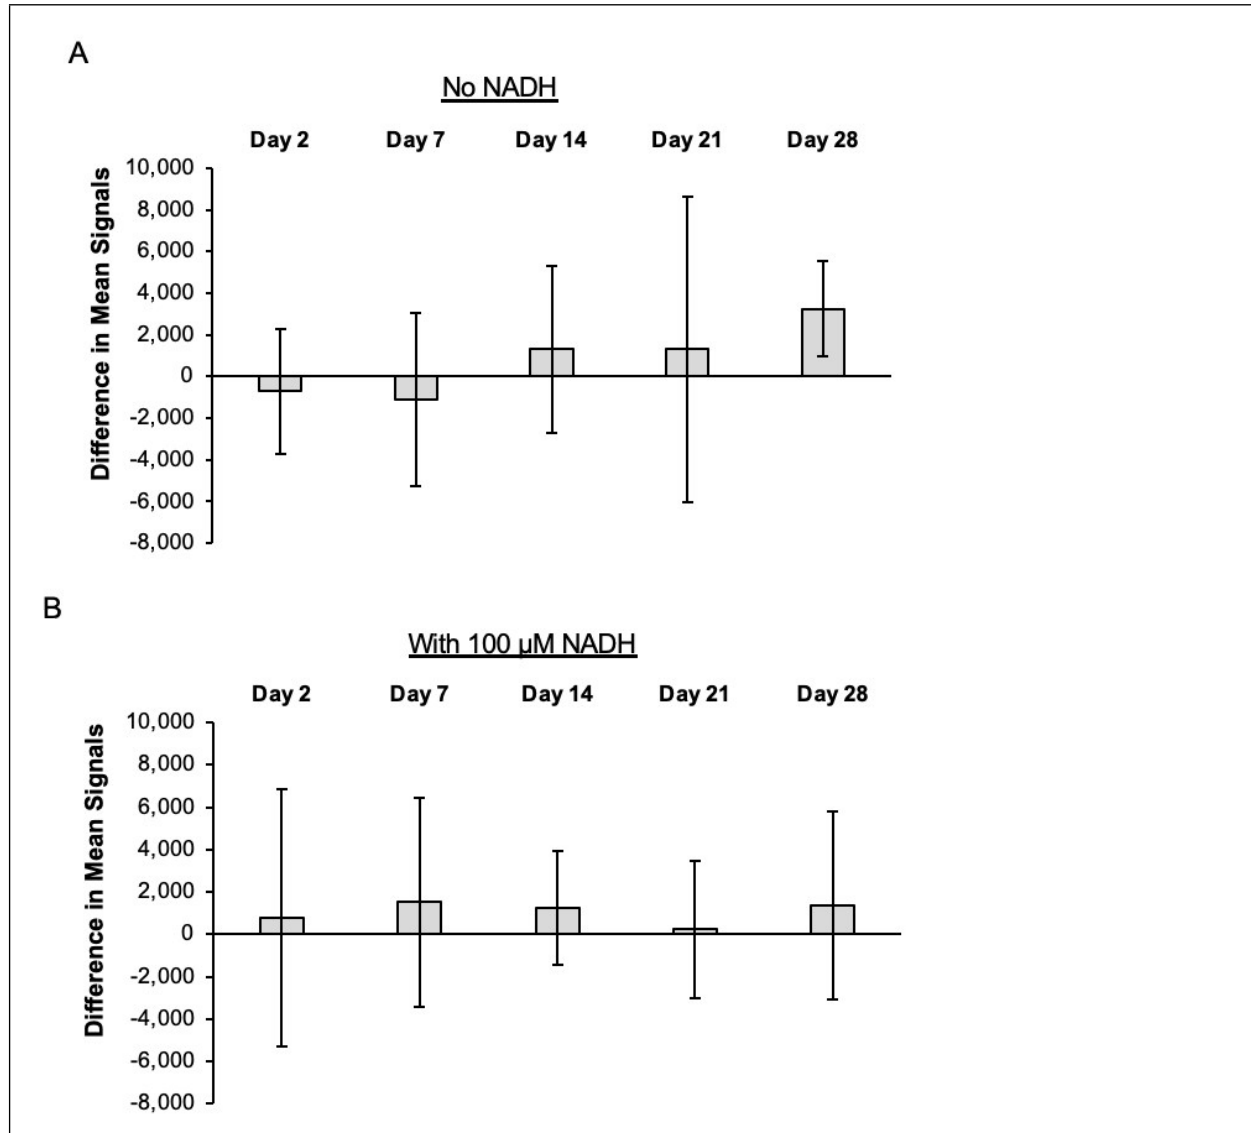

**Figure S1: Difference in mean signals from stored colorimetric reagents and freshly-dried colorimetric reagents.** A sample of DI water only (no NADH) was used to rehydrate the colorimetric reagents in (A), while a sample of 100  $\mu\text{M}$  NADH was used to rehydrate the colorimetric reagents in (B). Error bars represent 99% confidence intervals ( $N = 3$ ). As discussed in the article, by day 28, the mean signal from the stored colorimetric reagents with “No NADH” was significantly different ( $\alpha = .01$ ) from the mean signal from the freshly-dried colorimetric reagents with “No NADH”.

### Comparison of PheDH activity from different source organisms

The effect of vacuum drying on the activity of two PheDHs, one from *Sporosarcina* sp. (Sigma-Aldrich) and another from *Thermoactinomyces intermedius* (Creative Enzymes), was investigated. Each of the enzymes was prepared in buffer (220 mM BTP pH 9.3) at 60 U/mL (using manufacturer specifications for U/mg of enzyme). Enzyme in buffer (10  $\mu$ L) was added to Eppendorf tubes ( $N = 5$ ), and the open tubes were dried in a vacuum dryer for 23 hours. Samples were then rehydrated in buffer (220 mM BTP pH 9.3). The enzyme (final concentration 0.5 U/mL) was added to a 384 well plate with Phe (final concentration 40 mg/dL) and the reaction was initiated with NAD<sup>+</sup> (final concentration 5 mM). The 340 nm absorbance signal at 10 minutes was recorded in a plate reader (Synergy-2, BioTek, Winooski, WA, USA), and the absorbance from wells with PheDH and NAD<sup>+</sup> only, was subtracted. The background-corrected absorbance signal was compared to the background-corrected absorbance signal of the analogous reaction using enzyme that had not been dried.

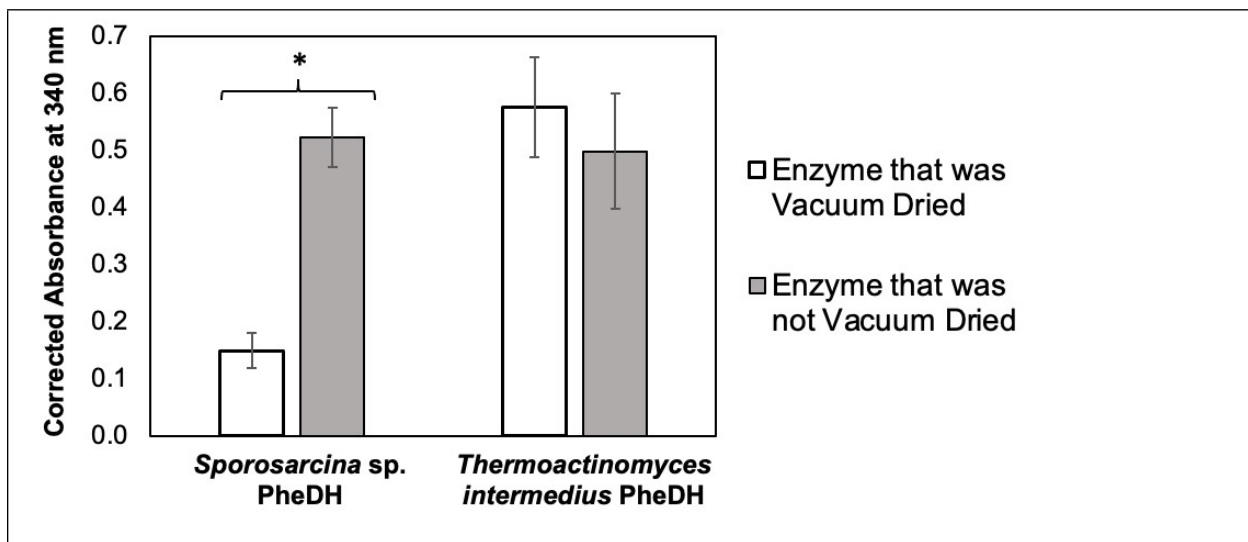

**Figure S2: Comparison of the effect of vacuum drying PheDHs from different source organisms.** Vacuum-dried PheDH from *Sporosarcina* sp. demonstrated a 71% reduction in activity compared to the corresponding *Sporosarcina* sp. PheDH that was not vacuum dried ( $P = .0000046$ ). Vacuum-dried PheDH from *Thermoactinomyces intermedius* did not have a significantly different signal ( $P = .2$ ) compared to the *Thermoactinomyces intermedius* PheDH that was not vacuum dried. Bars represent the background-corrected absorbance averages of replicates ( $N = 5$ ) and error bars represent the standard deviation.

### Stored PheDH enzyme activity over time

Differences between the mean signals of stored reagents and freshly-dried reagents are displayed. The difference in means was calculated as follows,  $difference\ in\ means = (freshly\ -\ dried\ samples\ mean) - (stored\ samples\ mean)$ , and then plotted for various storage times. The error bars display the 99% confidence intervals using the t-distribution. Degrees of freedom were estimated using the Welch-Satterthwaite approximation.

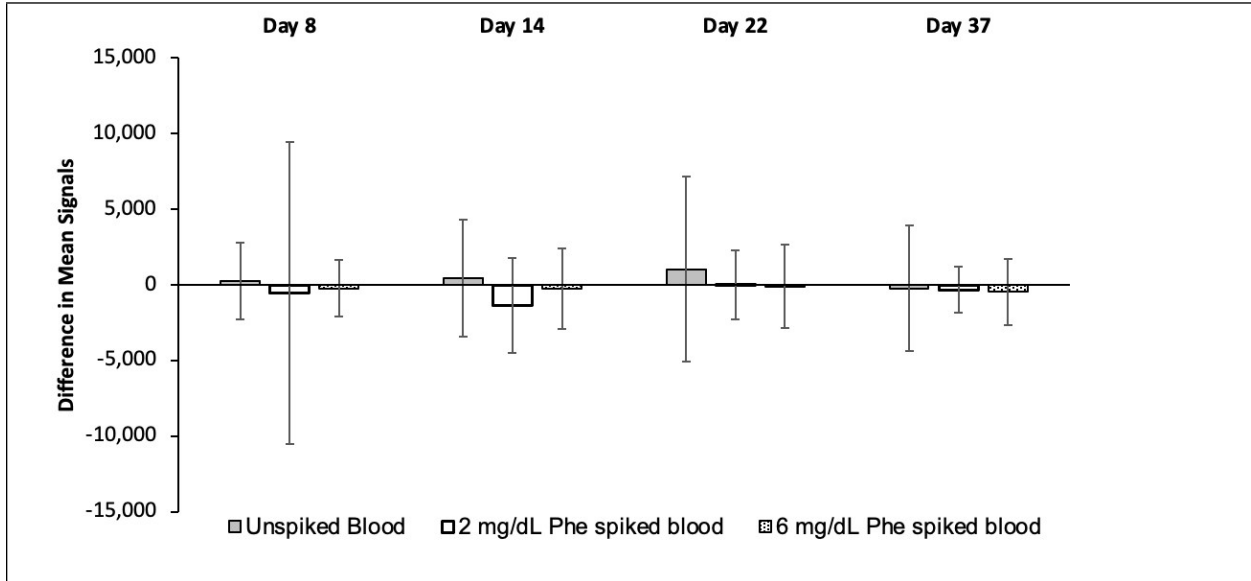

**Figure S3: Difference in mean signals from stored PheDH and freshly-dried PheDH in full devices with all other reagents freshly dried.** Devices were evaluated using samples of unspiked whole blood or whole blood spiked with 2 mg dL<sup>-1</sup> or 6 mg dL<sup>-1</sup> Phe after different storage times. Error bars represent 99% confidence intervals ( $N = 3$  or 4).

### Storage of coenzyme NAD<sup>+</sup>

Differences between the mean signals of stored reagents and freshly-dried reagents are displayed. The difference in means was calculated as follows,  $difference\ in\ means = (freshly\ dried\ samples\ mean) - (stored\ samples\ mean)$ , and then plotted for various storage times. The error bars display the 99% confidence intervals using the t-distribution. Degrees of freedom were estimated using the Welch-Satterthwaite approximation.

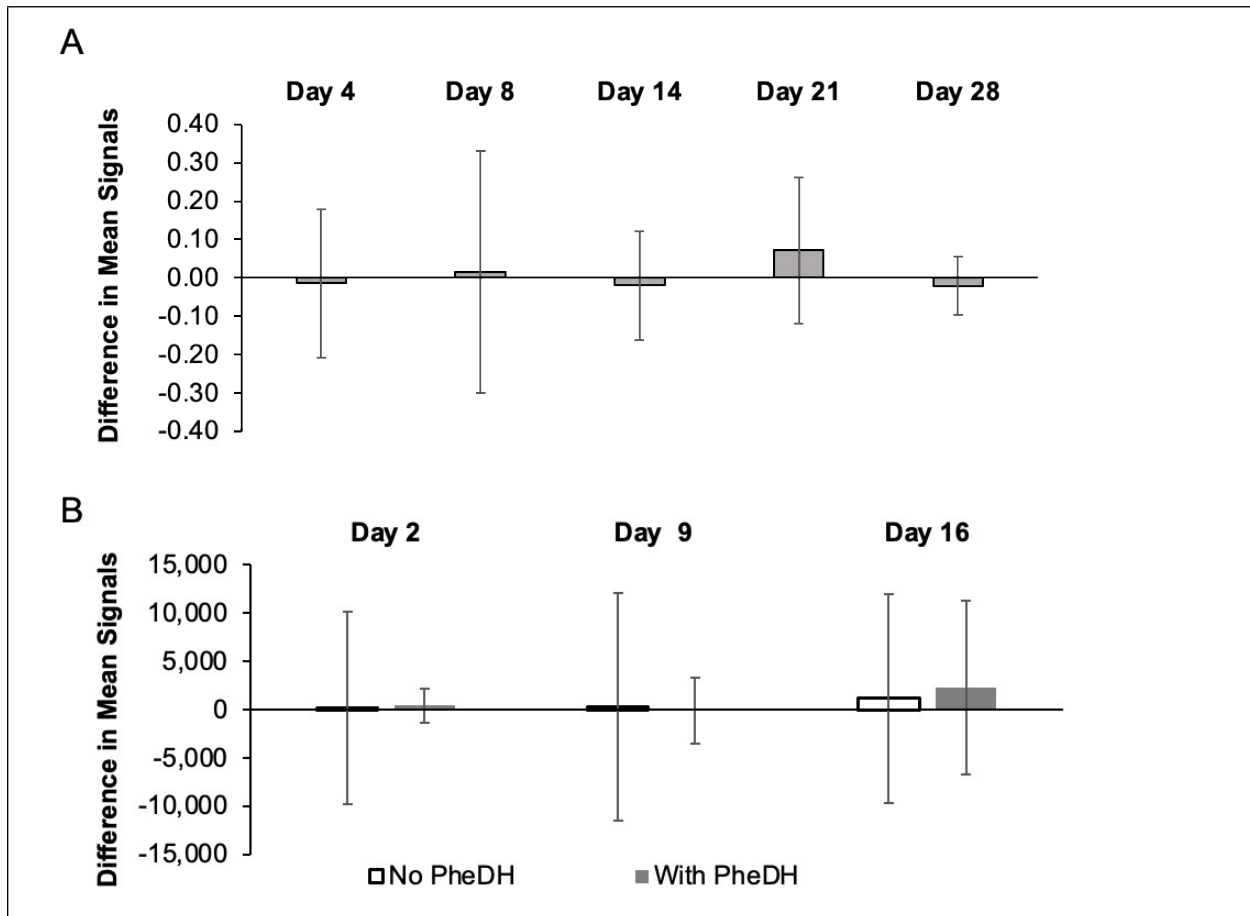

**Figure S4: Difference in mean signals from stored NAD<sup>+</sup> and freshly-dried NAD<sup>+</sup>.** (A) NAD<sup>+</sup> stored in GR-PSM pads and rehydrated with water were evaluated using the enzymatic reaction (Equation 1) over a month. Error bars represent 99% confidence intervals ( $N = 4$ ). (B) Full devices with pads stored with NAD<sup>+</sup> and all other reagents freshly dried were evaluated using samples of whole blood spiked with 6 mg dL<sup>-1</sup> Phe after different storage times. Error bars represent 99% confidence intervals ( $N = 3$ ).

### Complete devices with all reagents stored dry

Differences between the mean signals of stored reagents and freshly-dried reagents are displayed. The difference in means was calculated as follows,  $difference\ in\ means = (freshly\ dried\ samples\ mean) - (stored\ samples\ mean)$ , and then plotted for various storage times. The error bars display the 99% confidence intervals using the t-distribution. Degrees of freedom were estimated using the Welch-Satterthwaite approximation.

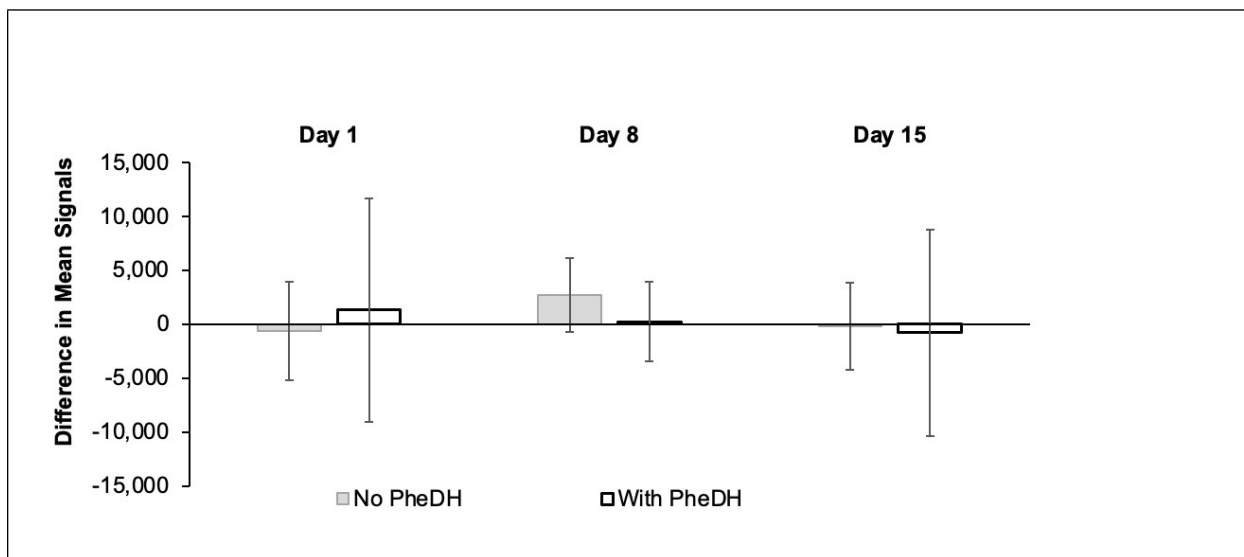

**Figure S5: Difference in mean signals from pull-tab devices with stored reagents and devices with freshly-dried reagents.** Devices were evaluated using samples of whole blood spiked with 6 mg dL<sup>-1</sup> Phe after different storage times and compared to signals from devices with freshly dried reagents prepared on that day. Error bars represent 99% confidence intervals ( $N = 3$ ).
